# Supplementary material for: Variant Prediction by Analyzing RdRp/S Gene Double or Low Amplification Pattern in Allplex SARS-CoV-2 Assay
Source: MDPI journal article supplement (doi:10.3390/diagnostics11101854), 2021-10-08
Supplement: s1 [file s1]

Table S1: Variant type determination using combined mutations

|                                      |                    | Variants I Assay |       |       | Variants IV Assay |       |       |
|--------------------------------------|--------------------|------------------|-------|-------|-------------------|-------|-------|
| Variant type<br>(WHO label/name)     |                    | 69/70del         | E484K | N501Y | K417N             | L452R | P681R |
| WHO VOC<br><br>(Variant Of Concern)  | Alpha, B.1.1.7     | ✓                |       | ✓     |                   |       |       |
|                                      | Beta, B.1.351      |                  | ✓     | ✓     | ✓                 |       |       |
|                                      | Gamma, P.1         |                  | ✓     | ✓     |                   |       |       |
|                                      | Delta, B.1.617.2   |                  |       |       |                   | ✓     | ✓     |
|                                      | Delta plus, AY.1&2 |                  |       |       | ✓                 | ✓     | ✓     |
| WHO VOI<br><br>(Variant Of Interest) | Eta, B.1.525       | ✓                | ✓     |       |                   |       |       |
|                                      | Iota, B.1.526      |                  | ✓     |       |                   |       |       |
|                                      | Kappa, B.1.617.1   |                  |       |       |                   | ✓     | ✓     |

Table S2. SARS-CoV-2 positive sample information and variant determinate results by Novaplex SARS-CoV-2 Variants I Assay and IV Assay.

| Sample Information |                 |                | Allplex SARS-CoV-2 Assay |                   |              |                      | Novaplex SARS-CoV-2 Variants I Assay |             |              |                 |                         | Novaplex SARS-CoV-2 Variants IV Assay |              |              |                         | Variant Type |
|--------------------|-----------------|----------------|--------------------------|-------------------|--------------|----------------------|--------------------------------------|-------------|--------------|-----------------|-------------------------|---------------------------------------|--------------|--------------|-------------------------|--------------|
| Sample_ Number     | Collection Date | Specimen       | E gene (Ct.)             | RdRp/S gene (Ct.) | N gene (Ct.) | RdRp/S Curve pattern | RdRP gene (Ct.)                      | E484K (Ct.) | N50 1Y (Ct.) | 69/70 del (Ct.) | Intera 1 contro 1 (Ct.) | L452 R (Ct.)                          | P681 R (Ct.) | K417 N (Ct.) | Intera 1 contro 1 (Ct.) |              |
| S1                 | 2021-01-20      | Nasopharyngeal | 27.07                    | 27.47             | 28.62        | Single_high          | 29.45                                | -           | -            | -               | 23.9                    | -                                     | -            | -            | 23.85                   | No variant   |
| S2                 | 2021-01-20      | Sputum         | 32.58                    | 32.09             | 32.54        | Single_high          | 35.49                                | -           | -            | -               | 23.56                   | -                                     | -            | -            | 23.63                   | No variant   |
| S3                 | 2021-01-22      | Nasopharyngeal | 26.52                    | 26.73             | 26.93        | Single_high          | 28.73                                | -           | -            | -               | 23.91                   | -                                     | -            | -            | 23.74                   | No variant   |
| S4                 | 2021-01-25      | Nasopharyngeal | 34.52                    | 34.81             | 35.57        | Single_high          | 37.51                                | -           | -            | -               | 24.95                   | -                                     | -            | -            | 24.98                   | No variant   |
| S5                 | 2021-01-28      | Nasopharyngeal | 35.87                    | 35.38             | 37.27        | Single_high          | 40.05                                | -           | -            | -               | 24.81                   | -                                     | -            | -            | 24.94                   | No variant   |
| S6                 | 2021-02-01      | Nasopharyngeal | 38                       | 38.22             | 37.04        | Single_high          | -                                    | -           | -            | -               | 27.08                   | -                                     | -            | -            | 27.24                   | Invalid      |
| S7                 | 2021-02-02      | Nasopharyngeal | 36.45                    | 34.65             | 35.09        | Single_high          | 37.61                                | -           | -            | -               | 25.95                   | -                                     | -            | -            | 25.98                   | No variant   |
| S8                 | 2021-02-08      | Nasopharyngeal | 33.51                    | 33.95             | 34.28        | Single_high          | 36.51                                | -           | -            | -               | 24.25                   | -                                     | -            | -            | 24.31                   | No variant   |
| S9                 | 2021-02-08      | Nasopharyngeal | 24.81                    | 24.22             | 25.64        | Single_high          | 26.26                                | -           | -            | -               | 25.48                   | -                                     | -            | -            | 25.24                   | No variant   |
| S10                | 2021-02-08      | Sputum         | 35.16                    | 34.2              | 36.87        | Single_high          | 37.81                                | -           | -            | -               | 26.02                   | -                                     | -            | -            | 26.3                    | No variant   |
| S11                | 2021-02-09      | Nasopharyngeal | 22.08                    | 21.7              | 24.11        | Single_high          | 23.56                                | -           | -            | -               | 24.11                   | -                                     | -            | -            | 23.98                   | No variant   |
| S12                | 2021-02-09      | Sputum         | 19.92                    | 19.46             | 21.22        | Single_high          | 21.81                                | -           | -            | -               | 26.55                   | -                                     | -            | -            | 26.55                   | No variant   |
| S13                | 2021-02-15      | Nasopharyngeal | 24.59                    | 24.13             | 23.96        | Single_high          | 26.76                                | -           | -            | -               | 23.5                    | -                                     | -            | -            | 23.79                   | No variant   |
| S14                | 2021-02-15      | Sputum         | 25.07                    | 26.02             | 24.49        | Single_high          | 27.53                                | -           | -            | -               | 23.7                    | -                                     | -            | -            | 23.65                   | No variant   |
| S15                | 2021-02-15      | Nasopharyngeal | 29.33                    | 29.68             | 29.93        | Single_high          | 31.16                                | -           | -            | -               | 27.71                   | -                                     | -            | -            | 27.74                   | No variant   |
| S16                | 2021-02-17      | Nasopharyngeal | 35.52                    | 36.28             | 38.5         | Single_high          | 39.42                                | -           | -            | -               | 24.43                   | -                                     | -            | -            | 24.34                   | No variant   |
| S17                | 2021-02-17      | Sputum         | 25.35                    | 25.22             | 26.18        | Single_high          | 26.88                                | -           | -            | -               | 25.39                   | -                                     | -            | -            | 25.59                   | No variant   |
| S18                | 2021-02-19      | Nasopharyngeal | 26.03                    | 25.74             | 26.33        | Single_high          | 27.32                                | -           | -            | -               | 27.66                   | -                                     | -            | -            | 27.6                    | No variant   |
| S19                | 2021-02-20      | Sputum         | 35.9                     | 34.6              | 35.51        | Single_high          | 39.12                                | -           | -            | -               | 26.2                    | -                                     | -            | -            | 26.34                   | No variant   |
| S20                | 2021-02-22      | Nasopharyngeal | 20.02                    | 20.1              | 21.63        | Single_high          | 21.96                                | -           | -            | -               | 26.39                   | -                                     | -            | -            | 26.58                   | No variant   |
| S21                | 2021-02-22      | Nasopharyngeal | 22.11                    | 22.01             | 23.48        | Single_high          | 24.12                                | -           | -            | -               | 25.07                   | -                                     | -            | -            | 25.32                   | No variant   |
| S22                | 2021-02-24      | Nasopharyngeal | 16.46                    | 16.46             | 18.24        | Single_high          | 18.04                                | -           | -            | -               | 23.31                   | -                                     | -            | -            | 23.82                   | No variant   |
| S23                | 2021-02-25      | Sputum         | 22                       | 21.84             | 23.63        | Single_high          | 23.37                                | -           | -            | -               | 25.45                   | -                                     | -            | -            | 25.27                   | No variant   |
| S24                | 2021-02-25      | Nasopharyngeal | 23.07                    | 22.87             | 23.48        | Single_high          | 25.24                                | -           | -            | -               | 26.07                   | -                                     | -            | -            | 26.64                   | No variant   |
| S25                | 2021-02-25      | Nasopharyngeal | 35.3                     | 37.6              | 37.71        | Single_high          | 39.67                                | -           | -            | -               | 26.38                   | -                                     | -            | -            | 26.59                   | No variant   |

|     |            |                |       |       |       |             |       |       |           |       |       |       |       |   |       |               |
|-----|------------|----------------|-------|-------|-------|-------------|-------|-------|-----------|-------|-------|-------|-------|---|-------|---------------|
| S26 | 2021-02-26 | Sputum         | 34.06 | 33.97 | 34.29 | Single_high | 38.03 | -     | -         | -     | 26.4  | -     | -     | - | 26.49 | No variant    |
| S27 | 2021-03-04 | Nasopharyngeal | 26.95 | 27.32 | 27.91 | Single_high | 29.22 | -     | -         | -     | 24.38 | -     | -     | - | 24.45 | No variant    |
| S28 | 2021-03-04 | Nasopharyngeal | 31.71 | 31.75 | 31.82 | Single_high | 33.53 | -     | -         | -     | 25.72 | -     | -     | - | 25.76 | No variant    |
| S29 | 2021-03-10 | Nasopharyngeal | 30.77 | 31.21 | 31    | Single_high | 33.03 | -     | -         | -     | 28.1  | -     | -     | - | 28.16 | No variant    |
| S30 | 2021-03-17 | Nasopharyngeal | 34.7  | 33.86 | 34.06 | Single_high | 37.43 | -     | -         | -     | 24.98 | -     | -     | - | 25.13 | No variant    |
| S31 | 2021-03-26 | Nasopharyngeal | 28.3  | 28.39 | 29.99 | Single_high | 27.18 | -     | -         | -     | 22.23 | -     | -     | - | 22.11 | No variant    |
| S32 | 2021-03-26 | Nasopharyngeal | 32.3  | 32.81 | 33.24 | Single_high | 32.9  | -     | -         | -     | 21.82 | -     | -     | - | 21.98 | No variant    |
| S33 | 2021-03-31 | Nasopharyngeal | 10.97 | 12.05 | 12.47 | Single_high | 10.23 | -     | -         | -     | 23.05 | -     | -     | - | 23.02 | No variant    |
| S34 | 2021-04-01 | Nasopharyngeal | 31.57 | 31.7  | 30.91 | Single_high | 32.06 | -     | -         | -     | 21.12 | -     | -     | - | 21.18 | No variant    |
| S35 | 2021-04-06 | Nasopharyngeal | 17.12 | 16.53 | 19.77 | Single_high | 16.4  | 18.88 | -         | -     | 23.76 | -     | -     | - | 23.87 | Indeterminate |
| S36 | 2021-04-06 | Nasopharyngeal | 29.82 | 29.5  | 29.18 | Single_high | 28.62 | -     | -         | -     | 23.69 | -     | -     | - | 23.64 | No variant    |
| S37 | 2021-04-13 | Nasopharyngeal | 16.31 | 17.02 | 17.46 | Single_high | 15.41 | -     | -         | -     | 21.65 | -     | -     | - | 21.79 | No variant    |
| S38 | 2021-04-27 | Nasopharyngeal | 18    | 17.68 | 22.84 | Single_high | 16.82 | 19.54 | -         | -     | 23.82 | -     | -     | - | 23.93 | Indeterminate |
| S39 | 2021-04-28 | Nasopharyngeal | 24.71 | 25.19 | 25.34 | Single_high | 24.27 | -     | -         | -     | 23.48 | -     | -     | - | 23.35 | No variant    |
| S40 | 2021-05-03 | Nasopharyngeal | 11.25 | 12.73 | 16.47 | Single_high | 10.91 | -     | -         | -     | 24.33 | 14.27 | -     | - | 24.3  | Indeterminate |
| S41 | 2021-05-04 | Nasopharyngeal | 21.8  | 21.73 | 25.15 | Single_high | 21.7  | 23.73 | -         | -     | 25.67 | -     | -     | - | 25.51 | Indeterminate |
| S42 | 2021-05-10 | Nasopharyngeal | 15.35 | 17.79 | 16.57 | Single_high | 14.98 | 17.29 | -         | 15.31 | 21.34 | -     | -     | - | 21.81 | Eta           |
| S43 | 2021-05-10 | Nasopharyngeal | 13.38 | 16.4  | 15.93 | Single_high | 13.99 | 16.16 | -         | 13.28 | 20.78 | -     | -     | - | 21.06 | Eta           |
| S44 | 2021-05-10 | Nasopharyngeal | 17.03 | 17.46 | 20.27 | Single_high | 17.14 | 19.07 | -         | -     | 23.34 | -     | -     | - | 23.49 | Indeterminate |
| S45 | 2021-05-11 | Nasopharyngeal | 19.16 | 19.21 | 22.73 | Single_high | 18.83 | 21.09 | -         | -     | 22.69 | -     | -     | - | 23.01 | Indeterminate |
| S46 | 2021-05-17 | Nasopharyngeal | 26.7  | 27.48 | 31.48 | Single_high | 28.02 | 29.76 | -         | -     | 22.61 | -     | -     | - | 22.74 | Indeterminate |
| S47 | 2021-05-18 | Nasopharyngeal | 18.94 | 19.57 | 23.94 | Single_high | 18.69 | 20.37 | -         | -     | 21.57 | -     | -     | - | 21.63 | Indeterminate |
| S48 | 2021-05-31 | Nasopharyngeal | 28.35 | 28.99 | 32.16 | Single_high | 28.18 | 31.12 | -         | -     | 20.3  | -     | -     | - | 20.25 | Indeterminate |
| S49 | 2021-06-01 | Sputum         | 27.33 | 27.55 | 31.48 | Single_high | 27.09 | 29.4  | -         | -     | 21.9  | -     | -     | - | 22.07 | Indeterminate |
| S50 | 2021-06-10 | Nasopharyngeal | 26.45 | 26.9  | 31.59 | Single_high | 25.88 | 28.51 | -         | -     | 19.66 | -     | -     | - | 19.82 | Indeterminate |
| S51 | 2021-06-11 | Nasopharyngeal | 10.42 | 12.36 | 11.42 | Double      | 9.86  | -     | -         | -     | 21.36 | 13.87 | 13.01 | - | 21.31 | Delta         |
| S52 | 2021-06-11 | Nasopharyngeal | 9.66  | 12.56 | 16.3  | Single_high | 12.5  | 16.15 | -         | -     | 22.82 | -     | -     | - | 22.81 | Indeterminate |
| S53 | 2021-06-11 | Nasopharyngeal | 15.41 | 14.98 | 19.33 | Single_high | 16.15 | 18.51 | -         | -     | 23.16 | -     | -     | - | 23.34 | Indeterminate |
| S54 | 2021-06-15 | Sputum         | 23.11 | 23.76 | 23.57 | Double      | 22.09 | -     | -         | -     | 24.14 | 25.11 | 23.44 | - | 24.18 | Delta         |
| S55 | 2021-06-16 | Nasopharyngeal | 26.92 | 28.2  | 28.19 | Double      | 26.56 | -     | 28.9<br>8 | 26.63 | 22.68 | -     | -     | - | 22.6  | Alpha         |

|     |            |                |       |       |       |             |       |       |   |   |       |       |       |   |       |               |
|-----|------------|----------------|-------|-------|-------|-------------|-------|-------|---|---|-------|-------|-------|---|-------|---------------|
| S56 | 2021-06-21 | Nasopharyngeal | 15.26 | 16.15 | 15.07 | Double      | 14.84 | -     | - | - | 23.77 | 17.72 | 16.1  | - | 23.88 | Delta         |
| S57 | 2021-06-21 | Sputum         | 11.71 | 14.25 | 13.05 | Double      | 13.95 | -     | - | - | 23.82 | 16.26 | 14.75 | - | 23.93 | Delta         |
| S58 | 2021-06-22 | Nasopharyngeal | 26    | 25.8  | 30.36 | Single_high | 26.44 | 29.1  | - | - | 21.33 | -     | -     | - | 21.3  | Indeterminate |
| S59 | 2021-06-28 | Nasopharyngeal | 24.58 | 24.02 | 28.67 | Single_high | 23.71 | 26.33 | - | - | 23.82 | -     | -     | - | 23.75 | Indeterminate |
| S60 | 2021-06-29 | Nasopharyngeal | 24.79 | 24.59 | 29.23 | Single_high | 23.83 | 26.29 | - | - | 20.79 | -     | -     | - | 20.9  | Indeterminate |
| S61 | 2021-07-02 | Nasopharyngeal | 9.68  | 11.79 | 10.66 | Double      | 9.05  | -     | - | - | 23.78 | 13.09 | 10.51 | - | 23.89 | Delta         |
| S62 | 2021-07-02 | Nasopharyngeal | 28.24 | 29.97 | 29.71 | Single_low  | 27.76 | -     | - | - | 22.61 | 31.29 | 28.8  | - | 22.59 | Delta         |
| S63 | 2021-07-05 | Nasopharyngeal | 10.36 | 12.73 | 11.72 | Double      | 9.33  | -     | - | - | 22.05 | 13.28 | 10.33 | - | 22.08 | Delta         |
| S64 | 2021-07-05 | Nasopharyngeal | 34.82 | 36.43 | 33.63 | Single_low  | 33.89 | -     | - | - | 23.72 | 37.06 | 34.47 | - | 23.91 | Delta         |
| S65 | 2021-07-06 | Nasopharyngeal | 10.27 | 10.04 | 15.7  | Single_high | 10.07 | 11.12 | - | - | 22.08 | -     | -     | - | 22.33 | Indeterminate |
| S66 | 2021-07-06 | Nasopharyngeal | 30.54 | 32.39 | 29.65 | Single_low  | 31.82 | -     | - | - | 22.93 | 34.68 | 31.42 | - | 23.08 | Delta         |
| S67 | 2021-07-07 | Nasopharyngeal | 25.23 | 24.62 | 29.63 | Single_high | 25.48 | 27.08 | - | - | 23.05 | -     | -     | - | 22.97 | Indeterminate |
| S68 | 2021-07-07 | Nasopharyngeal | 35.63 | 34.93 | 39.19 | Single_high | -     | -     | - | - | 23.9  | -     | -     | - | 22.89 | Invalid       |
| S69 | 2021-07-12 | Nasopharyngeal | 25.97 | 27.46 | 26.46 | Single_low  | 24.97 | -     | - | - | 23.67 | 28.54 | 26.33 | - | 23.33 | Delta         |
| S70 | 2021-07-12 | Nasopharyngeal | 24.13 | 23.71 | 28.51 | Single_high | 23.33 | 25.95 | - | - | 21.52 | -     | -     | - | 21.54 | Indeterminate |
| S71 | 2021-07-14 | Nasopharyngeal | 18.47 | 19.26 | 18.58 | Double      | 18.07 | -     | - | - | 23.14 | 21.69 | 19.27 | - | 23.27 | Delta         |
| S72 | 2021-07-14 | Nasopharyngeal | 11.42 | 12.69 | 18.23 | Single_high | 14.06 | 16.05 | - | - | 22.42 | -     | -     | - | 22.84 | Indeterminate |
| S73 | 2021-07-14 | Nasopharyngeal | 25.02 | 24.1  | 29.77 | Single_high | 23.97 | 27.18 | - | - | 22.44 | -     | -     | - | 22.54 | Indeterminate |
| S74 | 2021-07-14 | Sputum         | 17.07 | 16.57 | 21.8  | Single_high | 17.24 | 19.09 | - | - | 17.65 | -     | -     | - | 17.91 | Indeterminate |
| S75 | 2021-07-15 | Nasopharyngeal | 15.86 | 18.43 | 15.63 | Double      | 16.41 | -     | - | - | 23.27 | 18.83 | 16.83 | - | 23.67 | Delta         |
| S76 | 2021-07-15 | Sputum         | 15.27 | 16.52 | 15.99 | Double      | 16.55 | -     | - | - | 20.16 | 18.79 | 16.21 | - | 20.14 | Delta         |
| S77 | 2021-07-17 | Sputum         | 14.95 | 15.34 | 15.18 | Double      | 15.67 | -     | - | - | 23.57 | 18.11 | 16.4  | - | 23.87 | Delta         |
| S78 | 2021-07-19 | Nasopharyngeal | 26.48 | 25.51 | 30.66 | Single_high | 26.31 | 29.16 | - | - | 22.85 | -     | -     | - | 22.86 | Indeterminate |
| S79 | 2021-07-19 | Sputum         | 25.64 | 24.77 | 30.01 | Single_high | 25.56 | 27.49 | - | - | 21.58 | -     | -     | - | 21.76 | Indeterminate |
| S80 | 2021-07-19 | Nasopharyngeal | 22.87 | 24.32 | 24.24 | Single_low  | 23.49 | -     | - | - | 20.63 | 27.78 | 24.21 | - | 20.98 | Delta         |
| S81 | 2021-07-20 | Sputum         | 20.37 | 21.79 | 20.63 | Double      | 23.84 | -     | - | - | 19.22 | 24.43 | 21.55 | - | 19.61 | Delta         |
| S82 | 2021-07-21 | Nasopharyngeal | 36.76 | 36.5  | 33.73 | Single_high | 35.55 | -     | - | - | 24.55 | -     | -     | - | 24.59 | No variant    |
| S83 | 2021-07-21 | Sputum         | 27.7  | 29.43 | 27.59 | Single_low  | 25.82 | -     | - | - | 23    | 29.15 | 26.68 | - | 23.13 | Delta         |
| S84 | 2021-07-21 | Nasopharyngeal | 26.13 | 27.03 | 26.06 | Single_low  | 28.94 | -     | - | - | 19.97 | 31    | 28.39 | - | 19.93 | Delta         |
| S85 | 2021-07-25 | Nasopharyngeal | 29.56 | 29.11 | 33.05 | Single_high | 29.95 | 32.76 | - | - | 22.52 | -     | -     | - | 22.59 | Indeterminate |

|     |            |                |       |       |       |            |       |   |   |   |       |       |       |   |       |       |
|-----|------------|----------------|-------|-------|-------|------------|-------|---|---|---|-------|-------|-------|---|-------|-------|
| S86 | 2021-07-26 | Sputum         | 23.28 | 23.68 | 23.1  | Single_low | 22.79 | - | - | - | 24.98 | 25.64 | 23.99 | - | 25.18 | Delta |
| S87 | 2021-07-28 | Nasopharyngeal | 15.7  | 16.39 | 15.73 | Double     | 14.88 | - | - | - | 22.48 | 18.82 | 16.41 | - | 22.68 | Delta |
| S88 | 2021-08-02 | Nasopharyngeal | 21.7  | 22.1  | 21.61 | Double     | 33.76 | - | - | - | 19.26 | 35.7  | 33.76 | - | 19.16 | Delta |
| S89 | 2021-08-04 | Nasopharyngeal | 16.77 | 16.94 | 15.39 | Double     | 16.64 | - | - | - | 24.21 | 19.51 | 17.92 | - | 24.28 | Delta |
| S90 | 2021-08-09 | Nasopharyngeal | 31.39 | 31.89 | 31.21 | Single_low | 32.03 | - | - | - | 24.04 | 34.43 | 33.08 | - | 24.24 | Delta |
| S91 | 2021-08-09 | Nasopharyngeal | 24.84 | 25.49 | 24.89 | Single_low | 24.46 | - | - | - | 24.26 | 27.57 | 25.61 | - | 24.34 | Delta |
| S92 | 2021-08-11 | Nasopharyngeal | 22.45 | 24.13 | 22.28 | Single_low | 22.01 | - | - | - | 20.86 | 26.14 | 23.78 | - | 21.27 | Delta |
| S93 | 2021-08-12 | Nasopharyngeal | 18.06 | 18.89 | 18.26 | Double     | 20.62 | - | - | - | 25.55 | 23.75 | 22.04 | - | 26    | Delta |
| S94 | 2021-08-25 | Nasopharyngeal | 13.65 | 14.35 | 13.64 | Double     | 16.08 | - | - | - | 25.91 | 18.88 | 17.5  | - | 26.37 | Delta |

---

Single\_high : Single with high amplification curve in RdRp/S

Single\_low : Single with low amplification curve in RdRp/S
